# Supplementary material for: A solid beta-sheet structure is formed at the surface of FUS droplets during aging
Source: Springer Nature journal article supplement (doi:10.1038/s41589-024-01573-w), 2024-03-11
Supplement: MOESM1 [file 41589_2024_1573_MOESM1_ESM.pdf]

# A solid beta-sheet structure is formed at the surface of FUS droplets during aging

In the format provided by the  
authors and unedited

## **Supplementary Material:**

**A solid beta-sheet structure is formed at the surface  
of FUS droplets during aging**

**Supplementary Table 1:** Overview of solid-state NMR investigations performed on different FUS constructs.

| <b>FUS sequence</b>         | <b>Solid-state NMR investigations</b>              | <b>Reference</b>      |
|-----------------------------|----------------------------------------------------|-----------------------|
| 1-214<br>monophasic         | Structure determination of the fibril core (39-95) | Murray et al., 2017   |
| 1-163<br>monophasic         | Maturation kinetics, structural studies            | Berkeley et al., 2021 |
| 1-267<br>mono- and biphasic | Maturation kinetics, structural studies            | This work             |

**Supplementary Table 2:** Overview about experimental parameters of the performed solid-state NMR experiments. For more details about the used adiabatic CP steps and the tangential shapes used see<sup>[1]</sup>.

| <b>Sample</b>                                                                   | <b>FUS NTD<br/>(monophasic)</b> | <b>FUS NTD<br/>(monophasic)</b>    | <b>FUS NTD<br/>(monophasic)</b> | <b>FUS NTD<br/>(monophasic)</b>                   | <b>FUS NTD<br/>(monophasic)</b> | <b>FUS NTD<br/>(monophasic)</b> |
|---------------------------------------------------------------------------------|---------------------------------|------------------------------------|---------------------------------|---------------------------------------------------|---------------------------------|---------------------------------|
| <b>Experiment</b>                                                               | <b>1D <sup>13</sup>C CP</b>     | <b>1D <sup>13</sup>C<br/>INEPT</b> | <b>2D DARR<br/>20 ms</b>        | <b>1D <sup>15</sup>N,<sup>1</sup>H<br/>CP-MAS</b> | <b>2D NCA</b>                   | <b>2D NCO</b>                   |
| $\nu_r$ / kHz                                                                   | 17                              | 17                                 | 17                              | 17                                                | 17                              | 17                              |
| $B_0$ / T                                                                       | 20                              | 20                                 | 20                              | 20                                                | 20                              | 20                              |
| <b>Transfer I</b>                                                               | <b>HC-CP</b>                    | <b>HC-<br/>INEPT</b>               | <b>HC-CP</b>                    | <b>HN-CP</b>                                      | <b>HN-CP</b>                    | <b>HN-CP</b>                    |
| $\nu_1(^1\text{H})$ / kHz                                                       | 60                              | -                                  | 60                              | 60                                                | 60                              | 60                              |
| $\nu_1(\text{X})$ / kHz                                                         | 41.6                            | -                                  | 38                              | 47                                                | -                               | -                               |
| $\nu_1(\text{Y})$ / kHz                                                         | -                               | -                                  | -                               | -                                                 | 43                              | 43                              |
| Shape                                                                           | Tangent <sup>1</sup> H          | -                                  | Tangent <sup>1</sup> H          | Tangent <sup>1</sup> H                            | Tangent <sup>1</sup> H          | Tangent <sup>1</sup> H          |
| <sup>13</sup> C carrier / ppm                                                   | 100                             | 100                                | 100                             | -                                                 | -                               | -                               |
| <sup>15</sup> N carrier / ppm                                                   | -                               | -                                  | -                               | 120                                               | 120                             | 120                             |
| CP contact time / ms                                                            | 0.6                             | -                                  | 0.6                             | 1.2                                               | 1.2                             | 1.2                             |
| <b>Transfer II</b>                                                              | -                               | -                                  | <b>DARR</b>                     | -                                                 | <b>NC-CP</b>                    | <b>NC-CP</b>                    |
| $\nu_1(^1\text{H})$ / kHz                                                       | -                               | -                                  | 17                              | -                                                 | -                               | -                               |
| $\nu_1(\text{X})$ / kHz                                                         | -                               | -                                  | -                               | -                                                 | 6                               | 6                               |
| $\nu_1(\text{Y})$ / kHz                                                         | -                               | -                                  | -                               | -                                                 | 11                              | 11                              |
| <sup>13</sup> C carrier/ ppm                                                    | -                               | -                                  | 100                             | -                                                 | 100                             | 100                             |
| CP contact time / ms                                                            | -                               | -                                  | 20                              | -                                                 | 6.5                             | 6.0                             |
| $t_1$ increments                                                                | 3072                            | 16384                              | 1536                            | 3072                                              | 3072                            | 3072                            |
| Sweep width ( $t_1$ ) / ppm                                                     | 100                             | 100                                | 100                             | 100                                               | 117                             | 117                             |
| Acquisition time ( $t_1$ ) / ms                                                 | 15.4                            | 81.9                               | 7.7                             | 15.4                                              | 15.4                            | 15.4                            |
| $t_2$ increments                                                                | -                               | -                                  | 3*072                           | -                                                 | 192                             | 192                             |
| Sweep width ( $t_2$ ) / ppm                                                     | -                               | -                                  | 100                             | -                                                 | 16                              | 16                              |
| Acquisition time ( $t_2$ ) / ms                                                 | -                               | -                                  | 15.4                            | -                                                 | 0.7                             | 0.7                             |
| <sup>1</sup> H Spinal-64 <sup>a</sup> or WALTZ-64 <sup>b</sup> decoupling / kHz | 90 <sup>a</sup>                 | 5 <sup>b</sup>                     | 90 <sup>a</sup>                 | 90 <sup>a</sup>                                   | 90 <sup>a</sup>                 | 90 <sup>a</sup>                 |
| Inter-scan delay / s                                                            | 2                               | 2                                  | 2.7                             | 1.5                                               | 2.7                             | 2.7                             |
| Number of scans                                                                 | 1024                            | 1024                               | 36                              | 1024                                              | 112                             | 160                             |
| Measurement time / h                                                            | 0.5                             | 0.5                                | 42                              | 0.4                                               | 16.5                            | 23.5                            |

**Supplementary Table 2 continued.**

| Sample                                                                          | FUS NTD<br>(biphasic)  | FUS NTD<br>(biphasic)    | FUS NTD<br>(biphasic)  |
|---------------------------------------------------------------------------------|------------------------|--------------------------|------------------------|
| Experiment                                                                      | 1D <sup>13</sup> C CP  | 1D <sup>13</sup> C INEPT | 2D DARR 20 ms          |
| $\nu_r$ / kHz                                                                   | 17                     | 17                       | 17                     |
| $B_0$ / T                                                                       | 20                     | 20                       | 20                     |
| Transfer I                                                                      | HC-CP                  | HC-INEPT                 | HC-CP                  |
| $\nu_1(^1\text{H})$ / kHz                                                       | 60                     | -                        | 60                     |
| $\nu_1(\text{X})$ / kHz                                                         | 40.8                   | -                        | 40.8                   |
| Shape                                                                           | Tangent <sup>1</sup> H | -                        | Tangent <sup>1</sup> H |
| <sup>13</sup> C carrier / ppm                                                   | 100                    | 100                      | 100                    |
| CP contact time / ms                                                            | 0.6                    | -                        | 0.6                    |
| Transfer II                                                                     | -                      | -                        | DARR                   |
| $\nu_1(^1\text{H})$ / kHz                                                       | -                      | -                        | 17                     |
| <sup>13</sup> C carrier/ ppm                                                    | -                      | -                        | 100                    |
| CP contact time / ms                                                            | -                      | -                        | 20                     |
| $t1$ increments                                                                 | 3072                   | 16384                    | 2560                   |
| Sweep width ( $t1$ ) / ppm                                                      | 100                    | 100                      | 100                    |
| Acquisition time ( $t1$ ) / ms                                                  | 15.4                   | 81.9                     | 12.8                   |
| $t2$ increments                                                                 | -                      | -                        | 3*072                  |
| Sweep width ( $t2$ ) / ppm                                                      | -                      | -                        | 100                    |
| Acquisition time ( $t2$ ) / ms                                                  | -                      | -                        | 15.4                   |
| <sup>1</sup> H Spinal-64 <sup>a</sup> or WALTZ-64 <sup>b</sup> decoupling / kHz | 90 <sup>a</sup>        | 5 <sup>b</sup>           | 90 <sup>a</sup>        |
| Interscan delay / s                                                             | 2                      | 2                        | 2.5                    |
| Number of scans                                                                 | 2048                   | 2048                     | 24                     |
| Measurement time / h                                                            | 1.1                    | 1.1                      | 43                     |

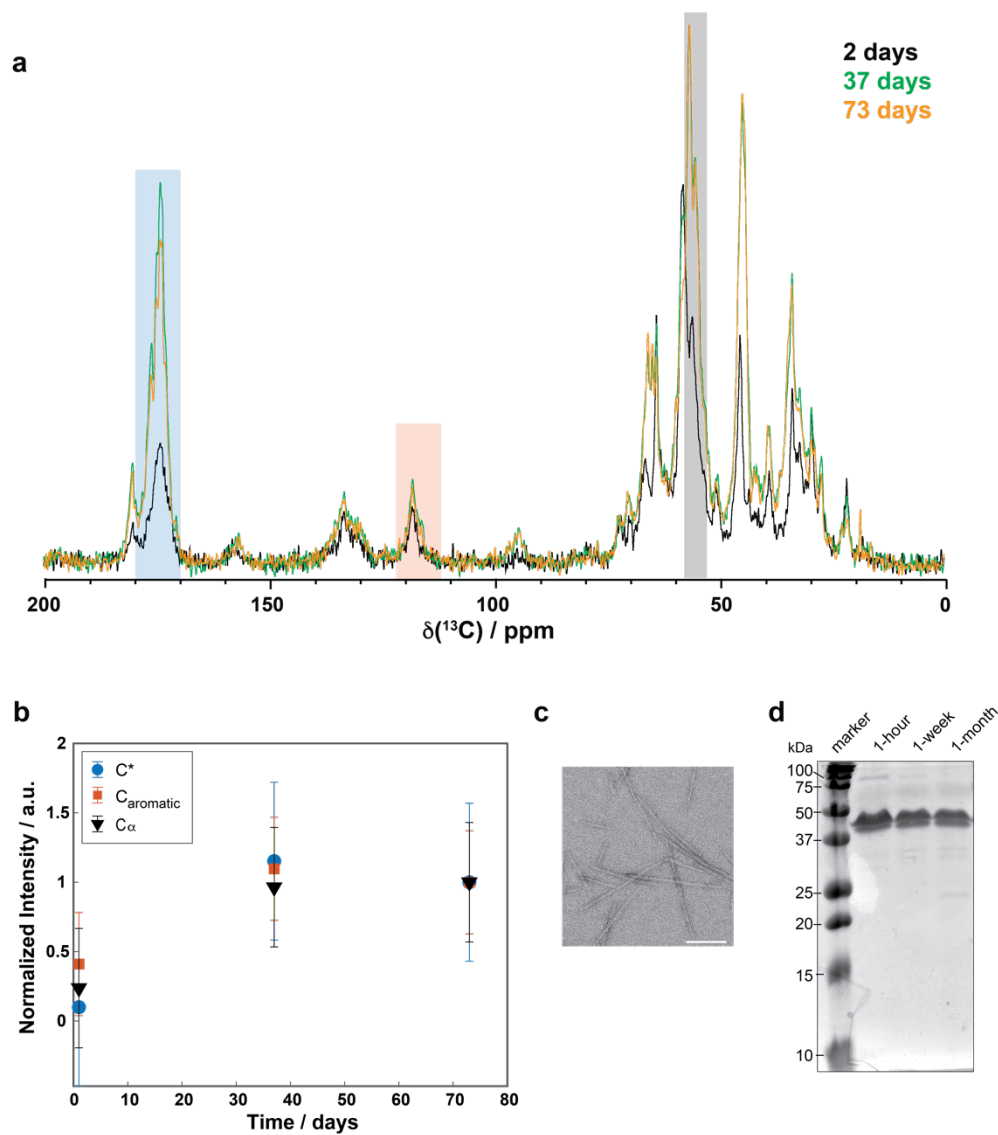

**Supplementary Fig. 1:** Maturation of biphasic FUS NTD. a) Comparison of 1D  $^{13}\text{C}$ -detected CP spectra of biphasic FUS-NTD recorded at various points in the maturation process. The signal intensity stays rather constant over long-term maturation (i.e. from 37 to 73 days), indicating a plateau in the fibrilization process. b) The plateau in fibrilization is also confirmed by the kinetic analysis of the integrated intensities, which show small changes in intensity (within standard deviation) after 37 days and 73 days of storage. All normalized intensities data are presented as means of signal-to-noise values  $\pm$  standard deviation. c) Electron-microscopy image of FUS fibrils taken on a biphasic sample matured for six months. Scale bar : 100 nm. d) Different time points from biphasic sample in a 15% SDS-PAGE gel. These samples do not contain agarose to allow electrophoresis, therefore already after 1-hour from sample preparation droplets have sedimented. Protein concentration is 120  $\mu\text{M}$ . Note, despite the molecular weight of the protein (26 kDa), it appears routinely at approximately 40 kDa. Both c and d performed twice with similar results.

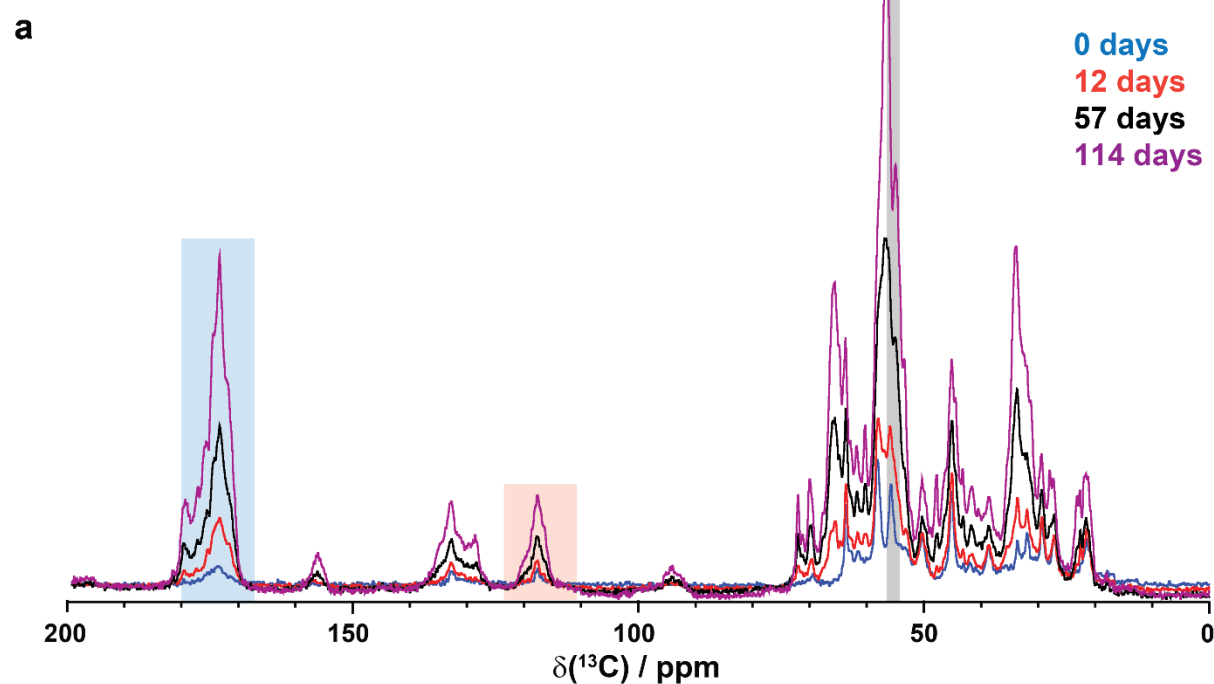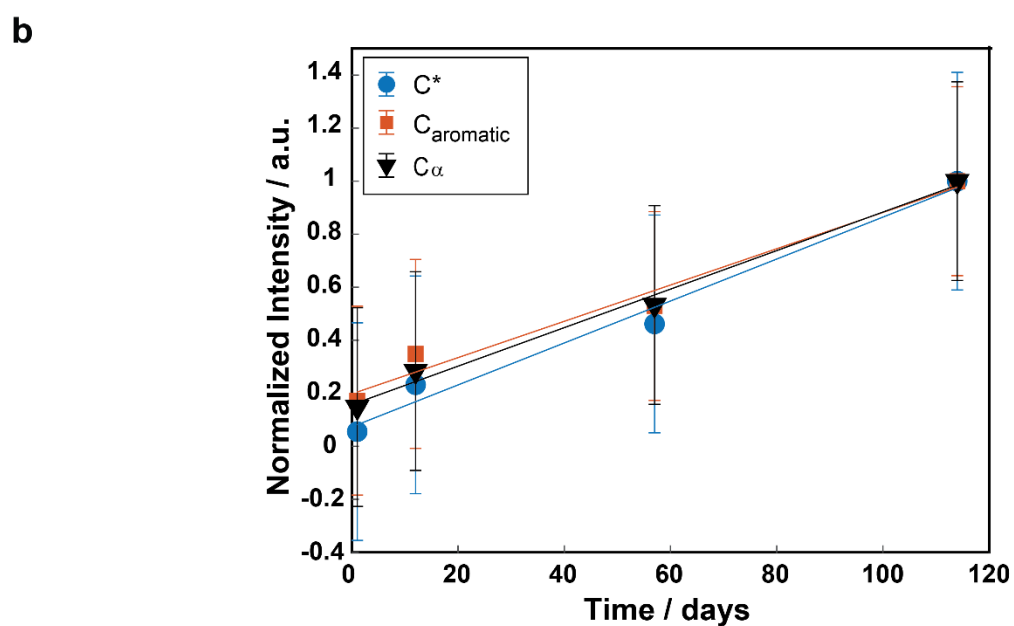

**Supplementary Fig. 2:** Maturation of monophasic FUS NTD. a) Comparison of 1D  $^{13}\text{C}$ -detected CP spectra of monophasic FUS-NTD recorded at various points in the maturation process. Differently from the biphasic sample, the signal intensity increases consistently over the whole time up to 114 days. b) The kinetic analysis of the integrated intensities shows a rather linear increase over time. Spectral regions highlighted in a) were used for the analysis. All normalized intensities data are presented as means of signal-to-noise values  $\pm$  standard deviation.

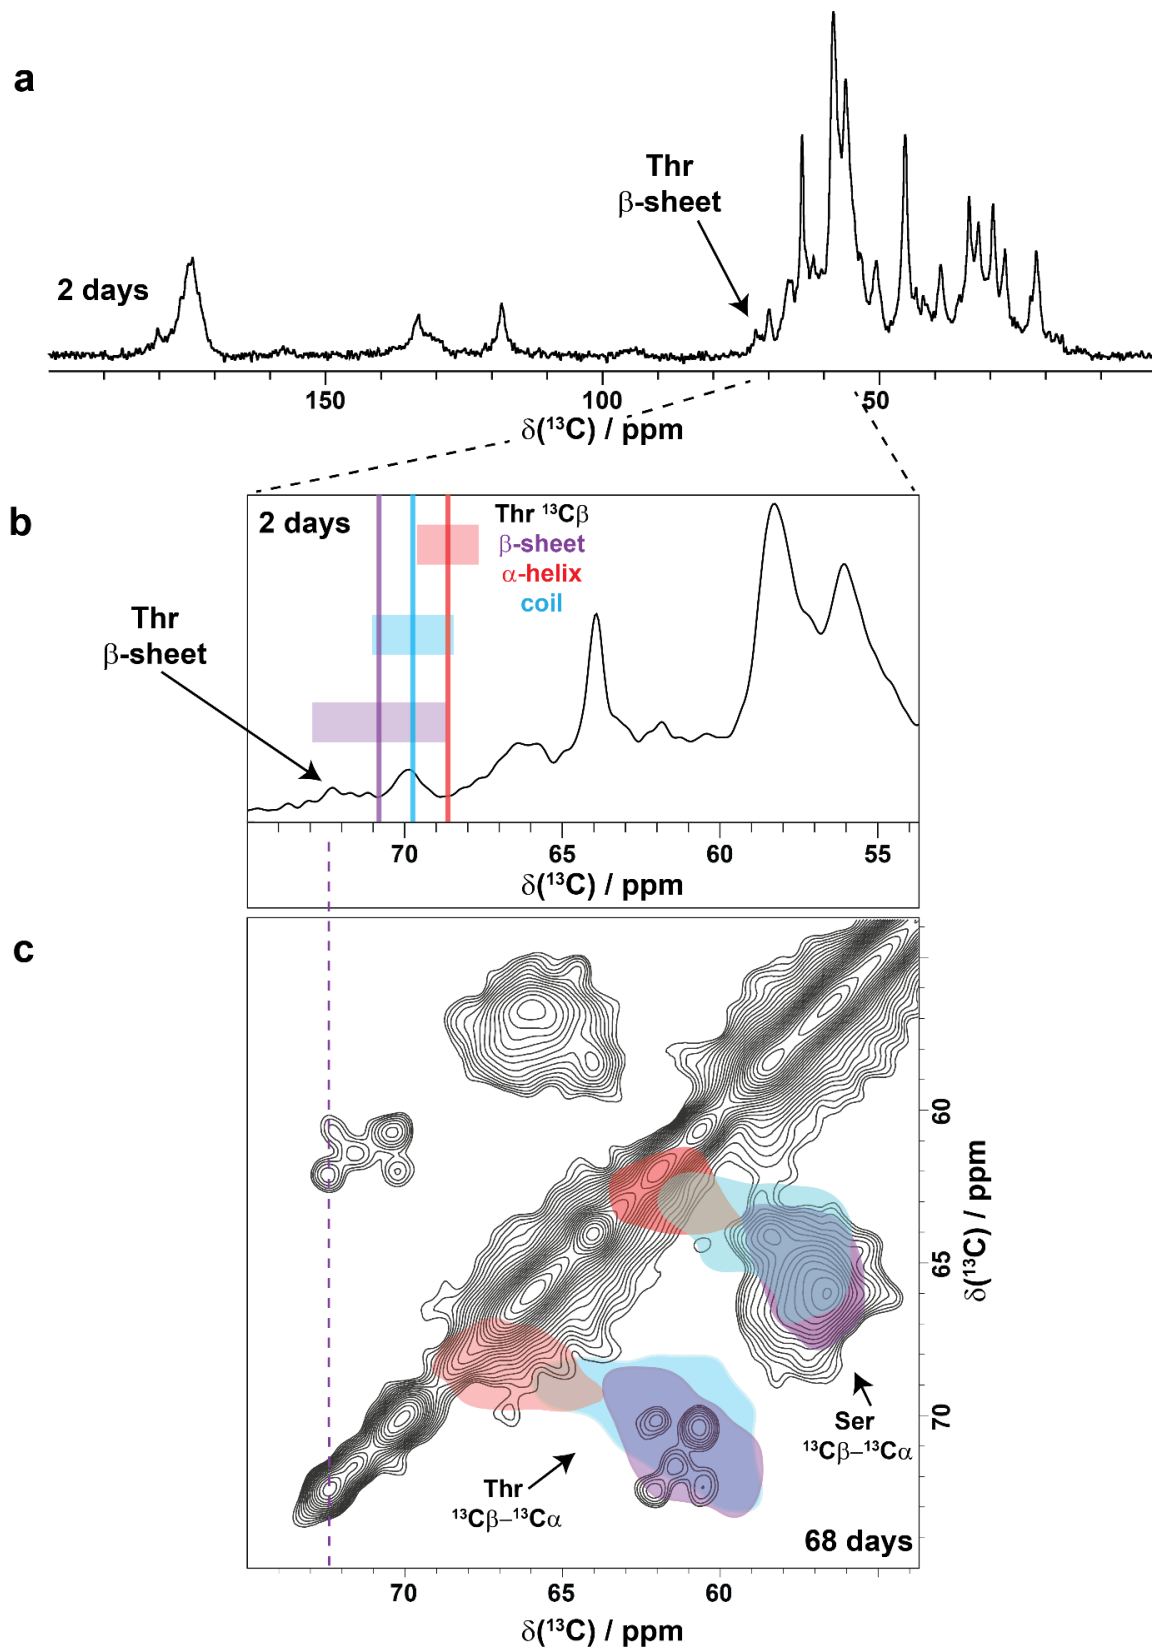

**Supplementary Fig. 3:** Secondary-structure chemical shift statistics indicates  $\beta$ -sheet formation. a) 1D  $^{13}\text{C}$  CP spectrum of monophasic FUS NTD recorded 2 days after preparation. b) Zoom into the  $^{13}\text{C}$  Ca/C $\beta$  region of the spectrum with threonine C $\beta$  chemical shift statistics plotted on top. c) Zoom into the 2D  $^{13}\text{C}$ - $^{13}\text{C}$  DARR spectrum of monophasic matured (68 days) FUS-NTD together with chemical-shift predictions for the well-resolved threonine and serine resonances. The details for the secondary-structure predictions of  $^{13}\text{C}$  Ca and C $\beta$  chemical-shift values are reported in the material and methods section. The three types of secondary structure elements are highlighted with different colors.





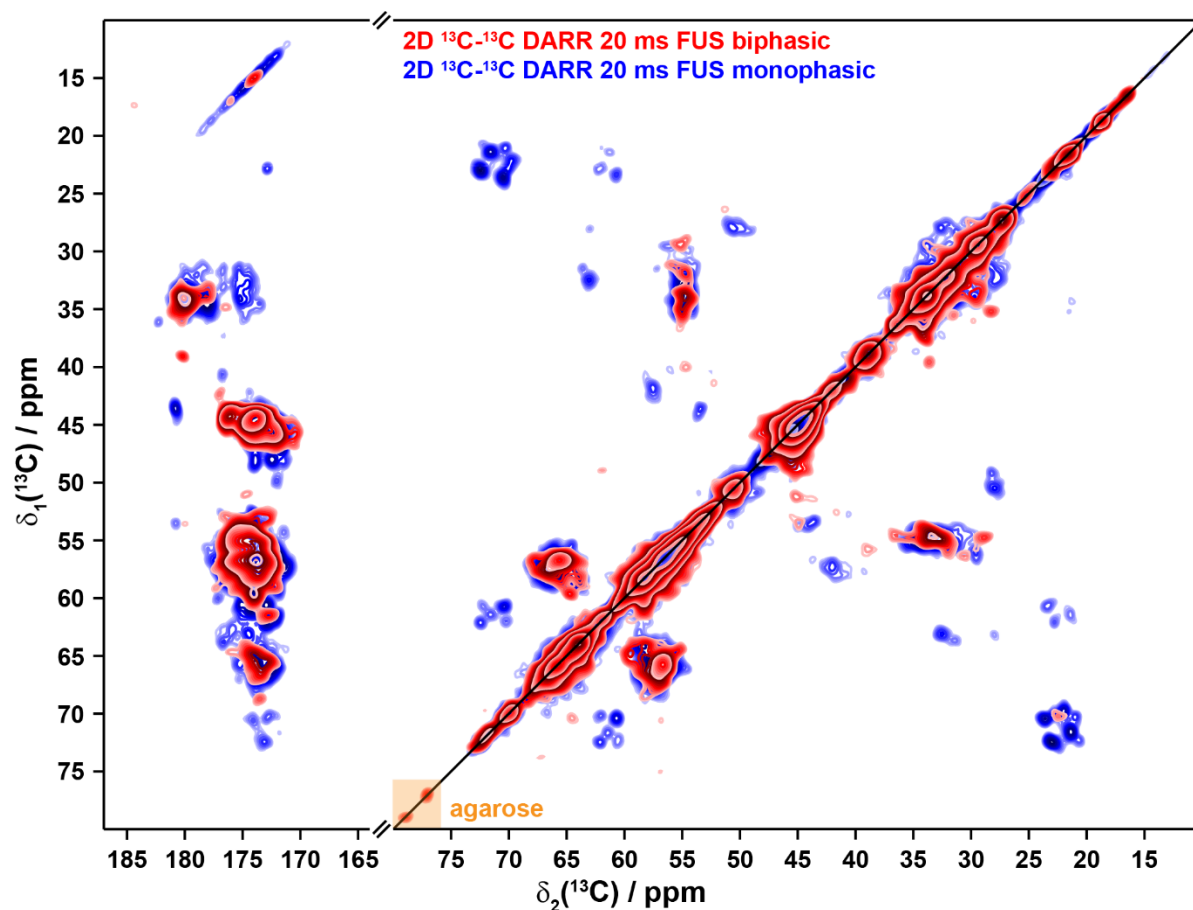

**Supplementary Fig. 5:** Comparison of 2D DARR spectra of the matured mono- and biphasic FUS-NTD samples (68 days and 37 days of maturation). The orange box indicates  $^{13}\text{C}$  signals originating from the agarose hydrogel matrix of the biphasic sample.
